# Supplementary material for: CRISPR/Cas9-Mediated Rapid Generation of Multiple Mouse Lines Identified Ccdc63 as Essential for Spermiogenesis
Source: PubMed Central journal article supplement (PMC4632774; doi:10.3390/ijms161024732), 2015-10-16
Supplement: ijms-16-24732-s001.pdf [file ijms-16-24732-s001.pdf]

## Supplementary Information

**Table S1.** Conservation of dynein complex genes \* between *Chlamydomonas reinhardtii* and *Mus musculus*.

| <i>Chlamydomonas</i> Gene            | Mouse (HUMAN) Gene         | MGI/HGNC Number ** | KO Mouse                                  |
|--------------------------------------|----------------------------|--------------------|-------------------------------------------|
| <i>Outer arm dynein (OAD)</i>        |                            |                    |                                           |
| <i>IC69</i>                          | <i>Dnaic2 (DNAI2)</i>      | 2685574/18744      | No                                        |
| <i>IC78</i>                          | <i>Dnaic1 (DNAI1)</i>      | 1916172/2954       | Yes (ciliary dyskinesia)                  |
| <i>LC1</i>                           | <i>Dnal1 (DNAL1)</i>       | 1921462/23247      | No                                        |
| <i>LC2</i>                           | <i>Tctex1d1 (TCTEX1D1)</i> | 1914594/26882      | No                                        |
|                                      | <i>Tctex1d2 (TCTEX1D2)</i> | 1913311/28482      | No                                        |
|                                      | <i>Tctex1d4 (TCTEX1D4)</i> | 3045358/32315      | No                                        |
|                                      | <i>Tcte3 (TCTE3)</i>       | 98642/11695        | Yes (infertile; impaired spermatogenesis) |
| <i>LC3/LC5</i>                       | <i>Nme8 (NME8)</i>         | 1920662/16473      | Yes (fertile)                             |
|                                      | <i>Nme9 (NME9)</i>         | 4359686/21343      | No                                        |
| <i>LC4</i>                           | <i>No determined (ND)</i>  | -                  | -                                         |
| <i>LC6/LC8/LC10</i>                  | <i>Dnal4 (DNAL4)</i>       | 1859217/2955       | No                                        |
|                                      | <i>Dynll1 (DYNLL1)</i>     | 1861457/15476      | Yes (pre-weaning lethality)               |
|                                      | <i>Dynll2 (DYNLL2)</i>     | 1915347/24596      | No                                        |
| <i>LC7</i>                           | <i>Dynlrb1 (DYNLRB1)</i>   | 1914318/15468      | No                                        |
|                                      | <i>Dynlrb2 (DYNLRB2)</i>   | 1922715/15467      | No                                        |
| <i>DC1</i>                           | <i>ND</i>                  | -                  | -                                         |
| <i>DC2</i>                           | <i>Ccdc114 (CCDC114)</i>   | 2446120/26560      | No                                        |
|                                      | <i>Ccdc63 (CCDC63)</i>     | 3607777/26669      | No                                        |
| <i>DC3</i>                           | <i>ND</i>                  | -                  | -                                         |
| <i>Inner arm dynein (IAD) (f/II)</i> |                            |                    |                                           |
| <i>IC138</i>                         | <i>Wdr78 (WDR78)</i>       | 2385328/ 26252     | No                                        |
| <i>IC140</i>                         | <i>Wdr63 (WDR63)</i>       | 3045269/30711      | No                                        |
| <i>IC97</i>                          | <i>Casc1 (CASC1)</i>       | 2444480/29599      | Yes (higher incidence of lung tumour)     |
| <i>FAP120</i>                        | <i>Ank2 (ANK2)</i>         | 88025/493          | Yes (embryonically lethal)                |
| <i>TCTEX1</i>                        | <i>Dynlt1a (DYNLT1)</i>    | 3807506/11697      | No                                        |
|                                      | <i>Dynlt1b (DYNLT1)</i>    | 98643/11697        | No                                        |
|                                      | <i>Dynlt1c (DYNLT1)</i>    | 3807476/11697      | No                                        |
|                                      | <i>Dynlt1f (DYNLT1)</i>    | 3780996/11697      | No                                        |
| <i>TCTEX2B</i>                       | <i>Tctex1d1 (TCTEX1D1)</i> | 1914594/26882      | No                                        |
|                                      | <i>Tctex1d2 (TCTEX1D2)</i> | 1913311/28482      | No                                        |
|                                      | <i>Tctex1d4 (TCTEX1D4)</i> | 3045358/32315      | No                                        |
|                                      | <i>Tcte3 (TCTE3)</i>       | 98642/11695        | Yes (infertile; impaired spermatogenesis) |

\* Note; only intermediate, light chains and docking complexes are listed. \*\* MGI URL: <http://www.informatics.jax.org/>; HGNC URL: <http://www.genenames.org/>.

**Table S2.** Mean computer assisted sperm analysis (CASA) values for *Dnaic1<sup>em1Osb/em1Osb</sup>* mice vs. control mice.

| Mouse Genotype                        | Incubation Time (min) | Motility (%)    | Progressive Motility (%) | Average Path Velocity (VAP) ( $\mu\text{m/s}$ ) | Linear Velocity (VSL) ( $\mu\text{m/s}$ ) | Curvilinear Velocity (VCL) ( $\mu\text{m/s}$ ) |
|---------------------------------------|-----------------------|-----------------|--------------------------|-------------------------------------------------|-------------------------------------------|------------------------------------------------|
| Ctrl                                  | 10                    | 87.0 $\pm$ 7.9  | 67.7 $\pm$ 5.0           | 119.7 $\pm$ 6.7                                 | 90.1 $\pm$ 7.6                            | 234.4 $\pm$ 5.4                                |
|                                       | 120                   | 89.3 $\pm$ 4.0  | 57.0 $\pm$ 3.5           | 114.4 $\pm$ 9.4                                 | 75.5 $\pm$ 6.1                            | 244.8 $\pm$ 34.7                               |
| <i>Dnaic1<sup>em1Osb/em1Osb</sup></i> | 10                    | 91.0 $\pm$ 6.1  | 73.3 $\pm$ 5.1           | 125.6 $\pm$ 7.3                                 | 96.2 $\pm$ 2.2                            | 217.6 $\pm$ 29.5                               |
|                                       | 120                   | 78.7 $\pm$ 17.0 | 54.0 $\pm$ 6.9           | 120.9 $\pm$ 4.7                                 | 73.3 $\pm$ 4.0                            | 255.0 $\pm$ 8.8                                |

Data are expressed as means  $\pm$  SD ( $n = 3$ ).

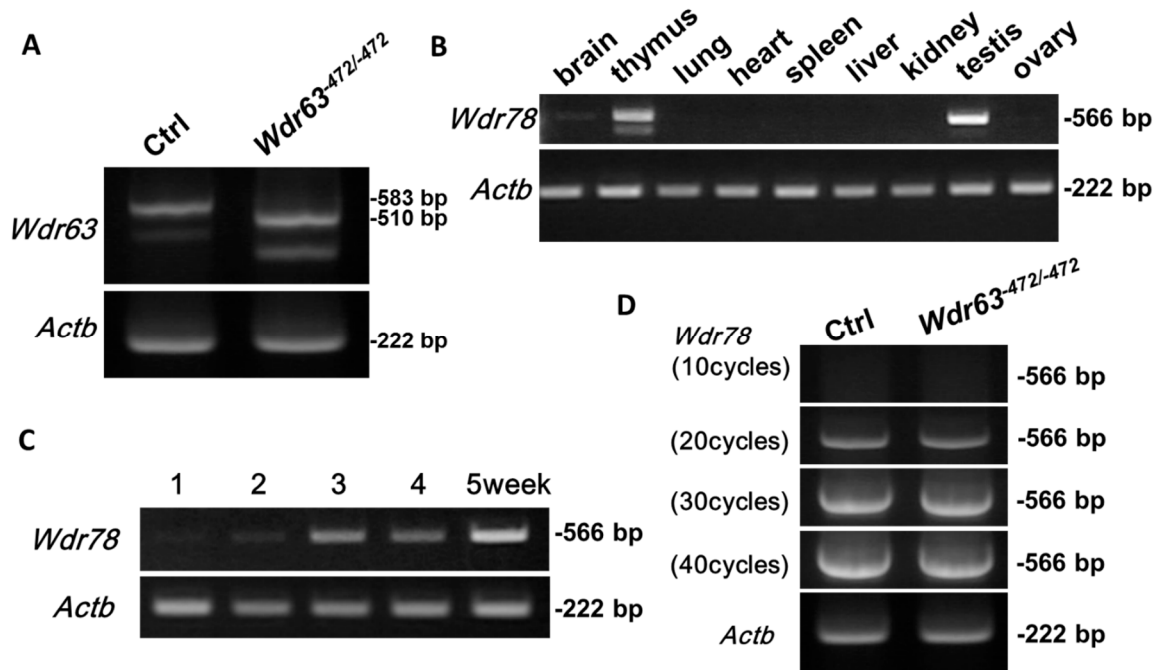**Figure S1.** (A) RT-PCR for *Wdr63* in control and sKO testes; (B) RT-PCR for *Wdr78* in various tissues and (C) testes samples at different ages; (D) Semi-quantitative RT-PCR of *Wdr78* in control and sKO testes; *Actb* ( $\beta$ -actin) as control.**Table S3.** Mean computer assisted sperm analysis (CASA) values for *Wdr63<sup>-472/-472</sup>* mice vs. control mice.

| Mouse Genotype                   | Incubation Time (min) | Motility (%)    | Progressive Motility (%) | Average Path Velocity (VAP) ( $\mu\text{m/s}$ ) | Linear Velocity (VSL) ( $\mu\text{m/s}$ ) | Curvilinear Velocity (VCL) ( $\mu\text{m/s}$ ) |
|----------------------------------|-----------------------|-----------------|--------------------------|-------------------------------------------------|-------------------------------------------|------------------------------------------------|
| Ctrl                             | 10                    | 93.3 $\pm$ 4.7  | 75.0 $\pm$ 3.6           | 115.5 $\pm$ 4.6                                 | 87.4 $\pm$ 4.9                            | 221.0 $\pm$ 21.6                               |
|                                  | 120                   | 85.7 $\pm$ 13.6 | 54.3 $\pm$ 7.8           | 112.8 $\pm$ 14.2                                | 71.1 $\pm$ 6.5                            | 242.8 $\pm$ 37.4                               |
| <i>Wdr63<sup>-472/-472</sup></i> | 10                    | 93.3 $\pm$ 4.2  | 80.0 $\pm$ 7.5           | 117.3 $\pm$ 6.3                                 | 95.7 $\pm$ 6.2                            | 188.0 $\pm$ 12.8                               |
|                                  | 120                   | 91.0 $\pm$ 6.9  | 57.0 $\pm$ 5.0           | 103.3 $\pm$ 2.4                                 | 64.1 $\pm$ 4.4                            | 188.7 $\pm$ 15.0                               |

Data are expressed as means  $\pm$  SD ( $n = 3$ ).

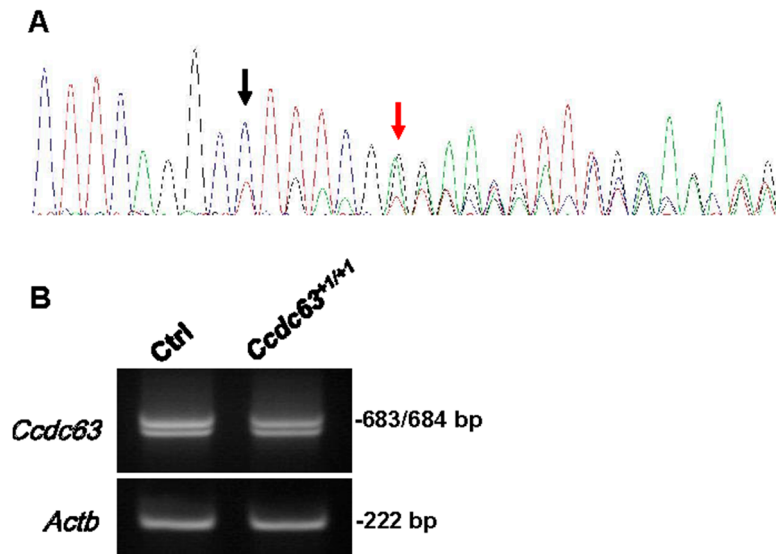

**Figure S2.** (A) Example of sequencing for a founder mosaic mouse. Black arrow indicates double wave (2 alleles) and red arrow indicates triple wave (3 alleles) (B) RT-PCR of *Ccdc63* in control and sKO testes. *Actb* ( $\beta$ -actin) as control.

**Table S4.** Off-target (OT) analysis of *Ccdc63* F0 mice.

| Target        | sgRNA Sequence + PAM*             | Location                  | Mutation     |
|---------------|-----------------------------------|---------------------------|--------------|
| <i>Ccdc63</i> | CCTTCTCG <u>GAAAGTTCCGAA</u> AGG  | Chr5: 122129838-122129860 | Yes (mosaic) |
| OT-1          | AAAATGATG <u>GAAAGTTCCGAA</u> GGG | Chr1: 132472528-132472550 | No           |
| OT-2          | CCTTTCGGA <u>ACTTTCTAAATTGA</u>   | Chr4: 101217425-101217447 | No           |
| OT-3          | CAGACTCTG <u>AAGTTCCGAA</u> GGG   | Chr19: 18320482-18320504  | No           |

\* PAM—protospacer adjacent motif; shown in red; 12 nucleotides homologous to *Ccdc63* target sgRNA underlined in black.

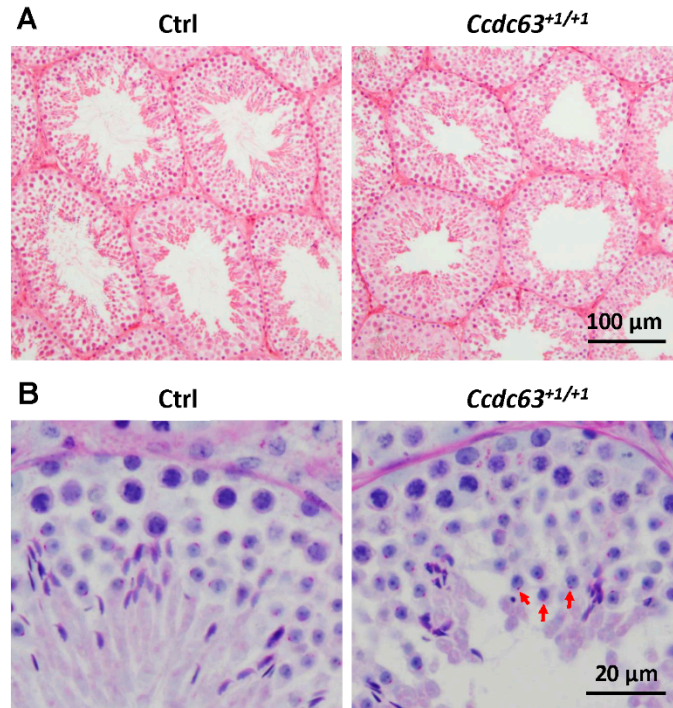

**Figure S3.** Morphological analysis of testes from control and *Ccdc63*<sup>+1/+1</sup> mice. (A) Hematoxylin/Eosin stained seminiferous tubules; (B) PAS/Hematoxylin staining of seminiferous tubules (stage III–IV), red arrows indicate developing acrosomes.

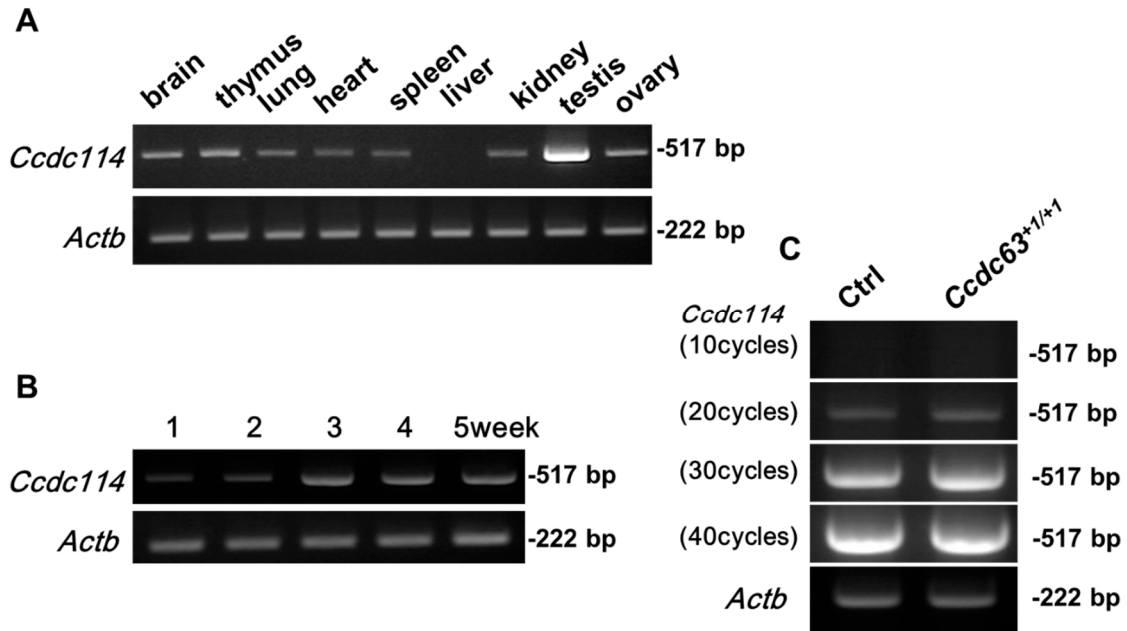

**Figure S4.** (A) RT-PCR for *Ccdc114* in various tissues and (B) testes samples at different ages. (C) Semi-quantitative RT-PCR of *Ccdc114* in control and sKO testes; *Actb* ( $\beta$ -actin) as control.
